# Supplementary material
Source: PubMed Central journal article supplement (PMC2855778)
Supplement: NIHMS178348-supplement-Sup__data_file_1.pdf [file NIHMS178348-supplement-Sup__data_file_1.pdf]

**Query ID**

lcl|57111

**Description**

Pros28.1ADsim (5'UTR and 5'region intron of GD19372 = 228 bp)

**Molecule type**

nucleic acid

**Query Length**

228

**Subject ID**

57113

**Description**

Pros28.1Amel (246 bp 5' region intron and part of exon of CG42322 +26bp 5'UTR = 272bp of the construct)

**Molecule type**

nucleic acid

**Subject Length**

272

**Program**

BLASTN 2.2.22





```
Query 49 AATAATTTATTT 60
      ||| |||
Sbjct 130 AATAATTTCTTT 119
```

Score = 15.7 bits (16), Expect = 1.1  
Identities = 11/13 (84%), Gaps = 0/13 (0%)  
Strand=Plus/Minus

```
Query 48 AAATAATTTATTT 60
      ||| ||| |||
Sbjct 201 AAATCCTTTATTT 189
```

Score = 15.7 bits (16), Expect = 1.1  
Identities = 10/11 (90%), Gaps = 0/11 (0%)  
Strand=Plus/Minus

```
Query 52 AATTTATTTAC 62
      || ||| |||
Sbjct 255 AAGTTATTTAC 245
```

Score = 13.9 bits (14), Expect = 3.7  
Identities = 7/7 (100%), Gaps = 0/7 (0%)  
Strand=Plus/Minus

```
Query 199 TATTTTG 205
      ||| |||
Sbjct 84 TATTTTG 78
```

Score = 13.9 bits (14), Expect = 3.7  
Identities = 7/7 (100%), Gaps = 0/7 (0%)  
Strand=Plus/Plus

```
Query 171 CAAAATA 177
        |||
Sbjct 78 CAAAATA 84
```

Score = 13.9 bits (14), Expect = 3.7  
Identities = 9/10 (90%), Gaps = 0/10 (0%)  
Strand=Plus/Minus

```
Query 22 ATAATATTTT 31
        |||
Sbjct 160 ATAATATGTT 151
```
