# Supplementary material
Source: PubMed Central journal article supplement (PMC2855778)
Supplement: NIHMS178348-supplement-Sup__data_file_2.pdf [file NIHMS178348-supplement-Sup__data_file_2.pdf]

**Query ID**

lcl|64049

**Description**

Pros28.1Amel (246 bp 5' region intron and part of exon of CG42322 +26bp 5'UTR = 272bp of the construct)

**Molecule type**

nucleic acid

**Query Length**

272

**Subject ID**

64051

**Description**

Pros28.1ADyak (5'UTR and 5'region intron of GE25683 = 289 bp)

**Molecule type**

nucleic acid

**Subject Length**

289

**Program**

BLASTN 2.2.22



```
Query 236 TTG---TTTCAAGTAAATAACTTGT CACAAGCAA 266
      ||      ||||| ||| ||||| ||| |||||
Sbjct 221 TTTACTTTTCAAATAACTAACTGGTCGCAAGCAA 254
```

Score = 24.7 bits (26), Expect = 0.003  
Identities = 16/18 (88%), Gaps = 0/18 (0%)  
Strand=Plus/Plus

```
Query 240 TTCAAGTAAATAACTTGT 257
      || || ||||| |||||
Sbjct 47 TTAAATTAAATAACTTGT 64
```

Score = 17.5 bits (18), Expect = 0.39  
Identities = 9/9 (100%), Gaps = 0/9 (0%)  
Strand=Plus/Plus

```
Query 108 TAAATAACT 116
      ||||| |||
Sbjct 53 TAAATAACT 61
```

Score = 15.7 bits (16), Expect = 1.4  
Identities = 8/8 (100%), Gaps = 0/8 (0%)  
Strand=Plus/Plus

```
Query 123 AAATTATT 130
      ||||| |||
Sbjct 33 AAATTATT 40
```

Score = 15.7 bits (16), Expect = 1.4  
Identities = 21/27 (77%), Gaps = 2/27 (7%)  
Strand=Plus/Minus

```
Query 103 TTTTGTAAT-AACTCAA-AGAAATT 127
          ||||| | | ||| ||| |||||
Sbjct 113 TTTTGTTACTTAACGCAATCAGAAATT 87
```

Score = 15.7 bits (16), Expect = 1.4  
Identities = 8/8 (100%), Gaps = 0/8 (0%)  
Strand=Plus/Plus

```
Query 261 AAGCAAAT 268
          |||||
Sbjct 136 AAGCAAAT 143
```

Score = 15.7 bits (16), Expect = 1.4  
Identities = 8/8 (100%), Gaps = 0/8 (0%)  
Strand=Plus/Plus

```
Query 109 AAATAACT 116
          |||||
Sbjct 231 AAATAACT 238
```

Score = 13.9 bits (14), Expect = 4.7  
Identities = 7/7 (100%), Gaps = 0/7 (0%)  
Strand=Plus/Plus

```
Query 98 GGGAGTT 104
```

Sbjct 12     |||||  
          GGGAGTT 18

Score = 13.9 bits (14), Expect = 4.7  
Identities = 7/7 (100%), Gaps = 0/7 (0%)  
Strand=Plus/Minus

Query 189   AAATAAA 195  
          |||||  
Sbjct 71     AAATAAA 65

Score = 13.9 bits (14), Expect = 4.7  
Identities = 7/7 (100%), Gaps = 0/7 (0%)  
Strand=Plus/Minus

Query 16     ATTCCAT 22  
          |||||  
Sbjct 128    ATTCCAT 122

Score = 13.9 bits (14), Expect = 4.7  
Identities = 7/7 (100%), Gaps = 0/7 (0%)  
Strand=Plus/Minus

Query 78     CAAAATA 84  
          |||||  
Sbjct 149    CAAAATA 143

Score = 13.9 bits (14), Expect = 4.7

Identities = 7/7 (100%), Gaps = 0/7 (0%)  
Strand=Plus/Minus

```
Query  243  AAGTAAA  249
          ||| |||
Sbjct  227  AAGTAAA  221
```

Score = 13.9 bits (14), Expect = 4.7  
Identities = 13/16 (81%), Gaps = 3/16 (18%)  
Strand=Plus/Plus

```
Query  51  GTCGCA---AAGTATA  63
          ||| ||| ||| |||
Sbjct  244  GTCGCAAGCAAGTATA  259
```

Score = 13.9 bits (14), Expect = 4.7  
Identities = 7/7 (100%), Gaps = 0/7 (0%)  
Strand=Plus/Plus

```
Query  32  CTAGCAA  38
          ||| |||
Sbjct  274  CTAGCAA  280
```
