# Supplementary material
Source: PubMed Central journal article supplement (PMC2855778)
Supplement: NIHMS178348-supplement-Sup__data_file_5.pdf [file NIHMS178348-supplement-Sup__data_file_5.pdf]

CLUSTAL 2.0.10 multiple sequence alignment

```
Dsim      CCTAAACACGGCATAGCCAGCTCCGGCCAATGTGGCCAGGACCACGCCGCTTAGGGTTCG 60
Dsec      CCTAAACACGGCATAGCCAGCTCCGGCCAATGTGGCCAGGACCACGCCGCTTAGGGTTCG 60
Dmel      CCTAAACACGGCATAGCCAGCTCCAGCCAATGTGGCCAAGACCACGCCGCTCAGGGTTCG 60
Dyak      CCTAAACACGGCATAGCCAGCTCCGGCCAATGTGGCCAGGACCACGCCGCTCAGGGTTCG 60
Dere      CCTAAACACGGCATAGCCAGCTCCGGCCAATGTGGCCAGGACCACGCCGCTCAGGGTTCG 60
dmoj      CCTAAACACGGCATAGCCGGCTGCAGCTAACGTGGCCAACACGACCCCGCTAACGTTTCG 60
Dvir      CCTAAACACGGCATAGCCGGCAGCAGCTAACGTGGCCAGCAGACGCCGCCCAATGTGCG 60
Dwil      CCTGAATACAGCATAACCGGCAGCGGACAATGTGGCCAGCACAACGCCGCCAAGTGTACG 60
dana      CCTAAACACGGCATAGCCGGCACCGGCCAGTGTGGCCAGGACAACGCCGCTCAGGGTGCG 60
Dpseu     CCGGAACACGGCATAGCCGGCGCCGGCCAGTGTGGCCAGAACGACGCCGCTCAGAGTCCG 60
Dgrim     CCTAAACACGGCATAACCGGCAGCAGCTAACGTGGCCAAAACAACGCCACCCAATGTGCG 60
**      ** ** * ** ** * * * * * ** ** * * * * * ** **
```

```
Dsim      GCTTTCCGTAATTCCATCCATGTAGGCTAGCAACGCTATTCCTGTGTGTCGCAGAGTATAAT 120
Dsec      GCTTTCCGTAATTCCATCCATGTAGGCTAGCAACGCTATTCCTGTGTGTCGCAGAGTATAAT 120
Dmel      GCTTTCCGTAATTCCATCCATATAGGCTAGCAACGCTATTCCTGTGTGTCGCAAAGTATAAT 120
Dyak      GCTTTCCGTGATTCCATCCATGTAGGCTAGCAACGCTATTCCTGTGTGTCGCAAAGTATAAT 120
Dere      GCTTTCCGTGATCCCATCCATGTAGGCTAGCAACGCTATGCCTGTGTGTCGCAGAGTATAAT 120
dmoj      ACTCTCCGTAATGCCGTCCATGTAGGCGAGCAGCGCAATGCCCGTGTGTCGCACAGGATAAC 120
Dvir      ACTCTCCGTAATGCCGTCCATATAGGCCAAGCAGAGCAATGCCCGTGTGTCGCACAGGATAAC 120
Dwil      GCTCTCTGTGATGCCATCCATATAGGCCAGCAGTGCATGCCCGTGTGTCGCAGAGGATAAC 120
dana      GCTCTCCGTGATCCCGTCCATGTAGGCCAGCAGGGCGATGCCCGTGTGTCGCAGAGAATGAT 120
Dpseu     ACTCTCGGTGATGCCGTCCATGTAGGCGAGCAGTGCATGCCCGTATCGCACAGAATGAT 120
Dgrim     ACTCTCCGTGATGCCGTCCATATAGGCCAAGCAACGCGATGCCAGTGTGTCGCACAGGATAAC 120
**      ** ** * * * * * ** ** * * * * * ** ** *
```

```
Dsim      GGCCACGATCTGCAAGATTCAAATTT-----TGTATAATATTTTTAAAAT 166
Dsec      GGCCACGATCTGCAAAATTCAAATTT-----TGTATAATATTTTTAAAAT 166
```

|       |                                                              |     |
|-------|--------------------------------------------------------------|-----|
| Dmel  | GGCCACGATCTGCAAAATAGGGGAGTGA-----TATGGGGAGTTTTGTAAAT         | 167 |
| Dyak  | GGCCACTATCTGCAACATAAGGGAGTTAGTCACTTG---CTCACAAATTATTCTAAAATT | 177 |
| Dere  | GGCCACGATCTGCAACATAAGGGAGCGATTATGCTAGGATTTGTATGATATTTTAGAACT | 180 |
| dmoj  | AGCCACAATCTAAGGTAGACATGGTTCACGTTGTTATTTTGCCTAGAAAATG-----    | 172 |
| Dvir  | GGCCACAATCTAAGGTAGGTATTGTTATTTTGGCCAATGTGCCATG-----          | 166 |
| Dwil  | AGCCACAATCTGAAAATGGAAGCCATGTAATGCGATTTGATTAGAT-----          | 166 |
| dana  | GGCCACGATCTGTAAAATATAATAATGAGCT-----AGGATTTTC-----           | 159 |
| Dpseu | GGCGACAATCTAGACGAATCACATTGGGCATTATGCAAAGACGAGA-----          | 166 |
| Dgrim | GGCCACAATCTAAGAATATTTGTTATTATTTATATGCTATTGAGCGGCTGGGCATAGTTG | 180 |

\*\* \*\* \*\*\*\*

|       |                                                              |     |
|-------|--------------------------------------------------------------|-----|
| Dsim  | AACTCAAAGGAAATAATTTATTTACAAAGAATTGTAATAACATCACATTATCA-----   | 219 |
| Dsec  | AACTCAAAGGAAATGATTTATTTACAAAGAATTGTAATAACATCACATTATCA-----   | 219 |
| Dmel  | AACTCAAAGGAAATTATTGATTTACAAAGAATTGTAATAACATATTATTATCA-----   | 220 |
| Dyak  | AAATTAATAACTTGTTTTATTTGCAAGGAATTGCACAAATTTCTGATTGCGT----TAA  | 233 |
| Dere  | AAATTAGGAAATGTGCTTTAGATACTTAGAATTGTAAAACTTTTGTGTTGCCCCCTATGC | 240 |
| dmoj  | -----                                                        |     |
| Dvir  | -----                                                        |     |
| Dwil  | -----                                                        |     |
| dana  | -----                                                        |     |
| Dpseu | -----                                                        |     |
| Dgrim | GGGCTTGTAAACTAGAGATGGGCGTTCATATAATAATTTAATAATTATAAAAA-----   | 233 |

|      |                                                               |     |
|------|---------------------------------------------------------------|-----|
| Dsim | -----TAATCATAATCACTATGGTGTA                                   | 241 |
| Dsec | -----TAATCATAATCACTATGGTGTA                                   | 241 |
| Dmel | -----TAATCATTACACTATGGTGTA                                    | 241 |
| Dyak | GTAACAAAAACATTAACATGGAATGGTACTAAGCAAATATTTTGTAGGCTTAAGAGAC    | 293 |
| Dere | ATAATCATTGCACTGTGCTGTAGAGTAGAGTAGCAATACATTTTTTTAGGCTTAAATACAT | 300 |
| dmoj | -----                                                         |     |
| Dvir | -----                                                         |     |

Dwil -----  
dana -----  
Dpseu -----  
Dgrim -----

Dsim GAAAATAAAGGATATTCACGTCAAAC TTTGAATATACGAAAAATTCATATTGTTTCAAC- 300  
Dsec GAAAATAAAGGATATTCACGTCAAAC TTCGAATATAAGAAAAATTCATATTGTTTCAAC- 300  
Dmel GAAAATAAAGGATTTTGA CTTCAAAC TTTCAAATGTAAGAAAAATTCATATTGTTTCAAG- 300  
Dyak ATTCAAAGACT---TTCACGTCAAACATCAGATGTATGAAAACTAATTACTTTTCAACT 350  
Dere TTTT TAGGCTCGAATCAACGTCAAACATCAGATATATGAAAACCTAATTTTTCAACCA-- 358  
dmoj -----  
Dvir -----  
Dwil -----  
dana -----  
Dpseu -----  
Dgrim -----

Dsim -----AAAATAACTGCTTGCAAGCAAACATTATATTTTG-TTGCCTGCTAACTAA 349  
Dsec -----AAAATAACTGCTGGCAAGCAAACATTATATTTCTGGTTGCCTGCTAACTAA 350  
Dmel -----TAAATAACTTGT CACAAGCAAATTGTTGTTTTGTTTTGCCTGCTAACTAA 350  
Dyak TTACTTTTCAAATAACTAACTGGTCGCAAGCAAGTATAGATTGCTCTGCCCCTAGCAAG 410  
Dere -----AGAATATTCAATATTCAAGCGAGAGTATATTGTTCTGCCCCTAACTAA 407  
dmoj -----  
Dvir -----  
Dwil -----  
dana -----  
Dpseu -----  
Dgrim -----

|       |                                                              |     |
|-------|--------------------------------------------------------------|-----|
| Dsim  | TCCAAAGGATGTCCTCACGCTACGATCGAGCTATAACCATATTCTCGCCGGATGGCCACC | 409 |
| Dsec  | TCCAAAGGATGTCCTCACGCTACGATCGAGCTATAACCATATTCTCGCCGGATGGCCACC | 410 |
| Dmel  | CCCAAAGGATGTCCTCACGCTACGGTCGAGCTCTAACCATATTCTCGCCGGATGGCCACC | 410 |
| Dyak  | TCCCAAGGATGTCCTCACGCTACGACCGAGCTGTTACCATATTCTCGCCGGATGGCCACC | 470 |
| Dere  | TCCCAAGGATGTCCTCACGCTACGATCGAGCTGTTACCATATTCTCGCCGGATGGCCACT | 467 |
| dmoj  | -----                                                        |     |
| Dvir  | -----                                                        |     |
| Dwil  | -----                                                        |     |
| dana  | -----                                                        |     |
| Dpseu | -----                                                        |     |
| Dgrim | -----                                                        |     |

|       |                                                               |     |
|-------|---------------------------------------------------------------|-----|
| Dsim  | TGTTGCAGGTGGAGTACGCCCAGGAAGCTGTTTCGAAAGGGTTCCACAGCGGTTGGCGTTC | 469 |
| Dsec  | TGTTGCAGGTGGAGTACGCCCAGGAAGCTGTTTCGAAAGGGTTCCACAGCGGTTGGCGTTC | 470 |
| Dmel  | TGTTGCAGGTGGAGTACGCCCAGGAAGCTGTTTCGAAAGGGCTCCACAGCGGTCGGCGTTC | 470 |
| Dyak  | TGTTGCAGGTGGAGTACGCCCAGGAAGCTGTTTCGAAAGGGCTCCACGGCGGTTGGGGTGC | 530 |
| Dere  | TGTTGCAGGTGGAGTACGCCCAGGAAGCTGTTTCGCAAGGGCTCCACAGCGGTTGGGGTTC | 527 |
| dmoj  | -----                                                         |     |
| Dvir  | -----                                                         |     |
| Dwil  | -----                                                         |     |
| dana  | -----                                                         |     |
| Dpseu | -----                                                         |     |
| Dgrim | -----                                                         |     |

|      |                                                             |     |
|------|-------------------------------------------------------------|-----|
| Dsim | GTGGAGCCAATTGCGTGCTGGGCGTGGAGAAGAGCTCGGTGTCCCCGATGCAGGAGG   | 529 |
| Dsec | GTGGAGCCAATTGCGTGCTGGGCGTGGAGAAGAGCTCGGTGTCCCCGATGCAGGAGG   | 530 |
| Dmel | GTGGAGCCAATTGTGTGGTGTGGGCGTGGAGAAGAGCTCGGTGTCCGAGATGCAGGAGG | 530 |
| Dyak | GTGGAGCCAATTGCGTGCTGGGCGTGGAGAAGAGCTCGGTGTCCAAGATGCAGGAGT   | 590 |

Dere GTGGAGCCAATTGCGTGGTGCTAGGCGTGGAGAAGAGCTCGTTGTCCAAGATGCAGGAGG 587  
dmoj -----  
Dvir -----  
Dwil -----  
dana -----  
Dpseu -----  
Dgrim -----TGATCCACTTAGAAAAAAGA 255

Dsim ATCGAACGGTGCAAAAGATCAGCATGCTCGACAAGCACGTTGCGTTGGCATTGCGCGGTC 589  
Dsec ATCGAACGGTGCAAAAGATCAGCATGCTCGACAAGCACGTTGCGTTGGCATTGCGCGGTC 590  
Dmel ATCGAACGGTGCGCAAGATCAGCATGCTCGATCGCCACGTGGCGTTGGCATTGCGCGGTC 590  
Dyak ACCGAACGGTGCGCAAGATCACCATGCTCGACAACCACGTGGCGTTGGCATTGCGCGGTC 650  
Dere ACCGCACGGTGCGCAAGATCACCATGCTCGACAACCACGTGGCGTTGGCATTGCGCGGTC 647  
dmoj -----  
Dvir -----  
Dwil -----  
dana -----  
Dpseu -----  
Dgrim AACGCATACAAATGAAAATCGTACTAAAAATTTGGTTTTTCTTATTTTTAGAAATTGTCA 315

Dsim TCACGGCCGATGCACGGATCCTAATAAATCGAGGGCAGATGGAGTGCCAGAGCCATCGAC 649  
Dsec TCACGGCCGATGCACGGATCCTAATAAATCGAGGGCAGATGGAGTGCCAGAGCCATCGAC 650  
Dmel TCACGGCCGATGCACGGATCCTTATAAATCGAGGGCAGGTTCGAGTGCCAGAGCCATCGAC 650  
Dyak TTACAGCCGATGCACGGATCCTAATAAATCGAGGGCAGGTTCGAGTGCCAGAGCCATCGTC 710  
Dere TTACGGCCGATGCACGGATCCTAATAAATCGAGGGCAGGTTCGAGTGCCAGAGCCATCGCC 707  
dmoj -----  
Dvir -----  
Dwil -----  
dana -----

Dpseu -----  
Dgrim CTACCAAAAATATTTTTTTCTTAAATATTCCCTTAAAAATACTTTCTATTATTAAAAAGTA 375

Dsim TCAACTTCGACAAACCGGTGACCCCGAGTACATCACCAGATACATTGCTCAGTTTAAGC 709

Dsec TCAACTTCGACAACCCGGTGAACCCCGAGTACATCACCAGATACATTGCCAGCATAAGC 710

Dmel TCAACTTCGAAAACCGGTGACCCTCGAGTACATCACCAGATACCTTGCCCAGCTCAAGC 710

Dyak TCAACTTCGAAAACGCGGTGACTCTCGAGTACATCACCAGATACATTGCCAGCTCAAGC 770

Dere TGAACCTTGAAAAGGCGGTGACCCTCGAGTACATCACCAGATACATTGCCAGCTCAAGC 767

dmoj -----

Dvir -----

Dwil -----

dana -----

Dpseu -----

Dgrim TAAGTGCCAACCATTTTTCTTAGAAAATATATTTTCAGAACTCGACTATCAACTTGTAT 435

Dsim ACAAGTACACTCAGTGCCTGGACGTCGTCTCTTTTCGGAATATCCTGTCTAGTCGGAGGCA 769

Dsec AGAAGTACACTCAGTGCCTGGACGTCGTCTCTTTTCGGAATATCCTGTCTAGTCGGAGGCA 770

Dmel AGAAGTACACGCAGTGCAATGGACGTCGTCTCTTTTCGGTATATCGTGTCTAATAGGAGGCA 770

Dyak AGAAGTACACGCAGAGCAATGGACGTCGTCTCTTTTCGGGATATCCTGTCTAATCGGAGGCA 830

Dere AGAAGTACACGCAGAGCAATGGACGTCGTCTCTTTTCGGCATATCCTGTCTCATTGGAGGCA 827

dmoj -----

Dvir -----

Dwil -----

dana -----

Dpseu -----

Dgrim ATTAGAGAAAACTCGAATCTAAGAACTCTAATGTAAGAATTCTATGCACACATAGAAA 495

Dsim TTGACGCCGATGGCTCTGCACGTCTCTCCACACGGAACCATCCGGGATATTCTACGAGT 829

|       |                                                              |     |
|-------|--------------------------------------------------------------|-----|
| Dsec  | TTGACGCCGATGGCTCTGCACGTCTCTTCCACACGGAACCATCCGGAATATTCTACGAGT | 830 |
| Dmel  | TTGACGCCGATGGCTCTGCACGTCTCTTTCATACCGAACCATCCGGGATATTCCACGAGT | 830 |
| Dyak  | TTGACCCCAATGGCTCTCCACGTCTATTCCACACCGAACCATCCGGTATATTCTACGAGT | 890 |
| Dere  | TGGACGCCAATGGCTCTGCACGTCTATTCCACACCGAACCATCCGGGATATTCTACGAGT | 887 |
| dmoj  | -----                                                        |     |
| Dvir  | -----                                                        |     |
| Dwil  | -----                                                        |     |
| dana  | -----                                                        |     |
| Dpseu | -----                                                        |     |
| Dgrim | ACAAACTCCCTGGAATTCAAACATTTTTCTTTTTAATTTTAGAAAAATTCATTTTGAAAT | 555 |

|       |                                                              |     |
|-------|--------------------------------------------------------------|-----|
| Dsim  | ACAAGGCGATCGCCACTGGGCGTTCGGCAAATACTGTGAGGGAGTTCTTTGAAAAGGCCT | 889 |
| Dsec  | ACAAGGCGATCTCCACTGGGCGTTCGGCAAATACTGTGAGGGAGTTCTTTGAAAAGGCCT | 890 |
| Dmel  | ACAAGGCGACCGCCACTGGGCGTTCGGCAAATACTGTGAGGGAGTTTTTTGAGAAGGCCT | 890 |
| Dyak  | ACAAGGCGAGCGCCACTGGACGTTCGGCAAATACTGTGAAGGAATTCTTTGAAAAGGCCT | 950 |
| Dere  | ACAAAGCGAGCGCCACTGGACGTTCGGCAAACACTGTGAGGGAATTCTTTGAAAAGGCCT | 947 |
| dmoj  | -----                                                        |     |
| Dvir  | -----                                                        |     |
| Dwil  | -----                                                        |     |
| dana  | -----                                                        |     |
| Dpseu | -----                                                        |     |
| Dgrim | TAAGTAATACAAATCCTGGTTTTTCAGACAACCGCAACTTTCATTTTATAAGTTTATTTT | 615 |

|      |                                                               |      |
|------|---------------------------------------------------------------|------|
| Dsim | ATCGCGACCATGAAGTGACAACCAAATGTGAAGCCATCAAAGCTAGCCACGCGTGCCCTTC | 949  |
| Dsec | ATCGCGACCATGAAGTGACAACCAAATGTGAAGCCATCAAGCTAGCCACACGAGCCCTTC  | 950  |
| Dmel | ATAGCGATCATGAAGTGACAACCAAATGTGATGCCATCAAAGCTAGCCATGCGTGCCCTTC | 950  |
| Dyak | ATCGTGATGATGAAGTGACCACCAAGTGTGGAGCCATCAAGCTGGCCATGCGTGCCCTTC  | 1010 |
| Dere | ATCGCGAAGATGAAGTGCCACCAAGTGTGGAGTCATTAAGCTGGCCATGCGTGCCCTTC   | 1007 |
| dmoj | -----                                                         |      |

Dvir -----  
Dwil -----  
dana -----  
Dpseu -----  
Dgrim CTGAATAGTAAGGCCAAGAGACCTTGGGGCCAAAAGTATGCCTAATTTTTTAAAATTCAAG 675

Dsim TCGAGGTAACCCAGTTGGGCCAGAGCCGCCTGGAGGTGGCTGTTTTGGAGAATGGCAAGC 1009  
Dsec TCGAGGTAACCCAGTTGGGCCAGAGCCGCCTGGAGGTGGCCGTTTTGGAGAATGGCAAGC 1010  
Dmel TCGAAGTAACCCAGATGAGCCAGATGCGCCTGGAGGTGGCCGTATTGGAGAATGGCAAGC 1010  
Dyak TCGAAGTCACCCAGTTAGGCCAGAGCCGCCTGGAGGTAGCCGTTTTGGAAAAGGGCAAGC 1070  
Dere TCGAAGTCACCCAGTTGGGCCAGAGCCGCCTGGAGGTAGCCGTTTTGGAGAAGGGCAAGC 1067

dmoj -----  
Dvir -----  
Dwil -----  
dana -----  
Dpseu -----  
Dgrim TCGATTTTGT TTTTATGTATGTTTCGTATTCGTGCCACGAGCT----- 717

Dsim CAATGAAGATGCTGGACAGCTGTGTAATTTTCGGAAATAGTTAAGATCCTTCAGAAGGAAA 1069  
Dsec CAATGAAGATGCTGGACAGCTGTGTTATTTTCGGAAATAGTTAAGATCTTTCAGAAGGAAA 1070  
Dmel CAATGAAAATGCTGGACAGTGTAGTAATTTTCGGAAATAGTCAAGATCGTTCAGAACGAAA 1070  
Dyak CAATGAATATGCTGGACGGCAGTGTAAATGCCGAAATAGTTAAGATCCTTCAAAGGAAA 1130  
Dere CGATGAAAATGCTGGACGGCAGTGTAAATGCCGAAATACTTAAGATCCTGCAGAGCGAAA 1127

dmoj -----  
Dvir -----  
Dwil -----  
dana -----  
Dpseu -----  
Dgrim -----



|       |                                                               |      |
|-------|---------------------------------------------------------------|------|
| Dsim  | AGGAGCAGGAGCTCCAAGCGAAGGCACATAAAAATGAAGAGATGAAATGCTGTTATCTACA | 1129 |
| Dsec  | AGGAGCAGGAGCTCCAAGCGAAGGCACATAAAAATGAAGAGATGAAATGCTGTTATCTACA | 1130 |
| Dmel  | AGGAGC-----TCCAAGCGAAGGCACATAAAAATGAAGAGATGAATTGC---TACACCTA  | 1121 |
| Dyak  | AGGAGCAGGAGCTCCAAAGGAAGACACATAAAAATGAACAAATAAAAC-----         | 1177 |
| Dere  | AGGAGCAGGAGCTCCAAAGGAAGACACATAAAAATGAACAAATGAAATACGGTTATCTAAA | 1187 |
| dmoj  | -----                                                         |      |
| Dvir  | -----                                                         |      |
| Dwil  | -----                                                         |      |
| dana  | -----                                                         |      |
| Dpseu | -----                                                         |      |
| Dgrim | -----                                                         |      |

|       |                                                               |      |
|-------|---------------------------------------------------------------|------|
| Dsim  | CCAATAGTTGATTTTTTATGTTTCATCAAATTGTTTTTGGATATTCATGTTATATTTTAAC | 1189 |
| Dsec  | CAAATAGTTGATTTTTTATGTTTATCAAATTGTTTT-----                     | 1166 |
| Dmel  | CAGATCGTTGATTTTTTATGTTTCATCAAATTGTTATTAGATATTCATGTTATAT-----  | 1175 |
| Dyak  | -----CTACAGATTATTTTTTATATTATTTGCTTTTTGTTTCAAACCTAT-----       | 1220 |
| Dere  | CCAACAGATCGTTTACCTTGCTTTTTTCTTTTCAAGGCTTTTTGGTTCAAATTAATAAATT | 1247 |
| dmoj  | -----                                                         |      |
| Dvir  | -----                                                         |      |
| Dwil  | -----                                                         |      |
| dana  | -----                                                         |      |
| Dpseu | -----                                                         |      |
| Dgrim | -----                                                         |      |

|      |                                                                |      |
|------|----------------------------------------------------------------|------|
| Dsim | T---ACAGTTTTTCATCATGTTTTGATGCTTGTGAAGGCTTTTTATCTTTGTATAATGCAGT | 1246 |
| Dsec | ----GTTTTTTTGGCTTGTGTTTTGATGCTTGTGAAGGCTTTTTATCTTTGTATAATGCAGT | 1222 |
| Dmel | ----TGTTTTGGAGCTTTGTTTAAATTTTGTGTTTTTGTGTTTTTAAATTAATTA        | 1230 |

|       |                                                              |      |
|-------|--------------------------------------------------------------|------|
| Dyak  | -----TATAATATTTTATATATATATCTTTTTATATTTCTT                    | 1256 |
| Dere  | CTAATTAAAATTCAAAGGGGGTAATACTAGTACTCAAATACAGAGATTTTTATAATGCCT | 1307 |
| dmoj  | -----                                                        |      |
| Dvir  | -----                                                        |      |
| Dwil  | -----                                                        |      |
| dana  | -----                                                        |      |
| Dpseu | -----                                                        |      |
| Dgrim | -----                                                        |      |

|       |                                                              |      |
|-------|--------------------------------------------------------------|------|
| Dsim  | AATAAATTAATGTTAAACGCTTTTGAAATTATAACTTTTGAATTTCAAATACAGATAC   | 1306 |
| Dsec  | AATAAATTAAGGTTAAACGCTTTTAAAATTATAACTTTTGAATTTTAAAATTGCAGATAT | 1282 |
| Dmel  | ATATACAGTTTTAACCATGTTTTGAAAATTATAACTTTTAAATTTCAAATATGCAGATAT | 1290 |
| Dyak  | TGGAACGTGTGTGTAAGGGG-----GGATCTTGCGGTTGCAGATTG               | 1297 |
| Dere  | TAAAAATGATTGTTACTGGCTTATCAAATCATAATTTGTGGATCCTACCGTTGCAGACAG | 1367 |
| dmoj  | -----AGGAAAAGGAGCAGCTGGCT                                    | 192  |
| Dvir  | -----GCACGCTGGGTAGGCGGCT                                     | 185  |
| Dwil  | -----TTTCGGAGG                                               | 175  |
| dana  | -----CATTTTAGGACTG                                           | 172  |
| Dpseu | -----CAGATGTGGTACA                                           | 179  |
| Dgrim | -----ATATAAATATATATTAAGAC                                    | 737  |

|      |                                                              |      |
|------|--------------------------------------------------------------|------|
| Dsim | AAAGTACTCACTCTAACGCCACGAACTGCTCGTGCAGGATCACCAGGATAGCAGGTAC   | 1366 |
| Dsec | AAAGTACTCACTCTAACGCCACGAACTGCTCGTGCAGGATCACCAGGATAGCAGGTAC   | 1342 |
| Dmel | AAAGCACTCACTCTAACGCCACGAACTGCTCGTGCAGGATCACCAGGATAGCAGGTAC   | 1350 |
| Dyak | AAATTACTTACCCTGACGCCACGAACTGCTCGTGCAGGATCACCAGGATAGCAGGTAC   | 1357 |
| Dere | AAATTACTCACTCTGACGCCACGAACTGCTCGTGGAGGATCACCAGGATAACAGGTAC   | 1427 |
| dmoj | ATAATACATACCCTAACGCCAACGAACTGCTCATGCAGTATGACCCAAGAGAGTAAATAG | 252  |
| Dvir | CCCATACTTACCCTCACGCCAACGAACTGCTCGTGCAGTATGACCCAAGAGAGCAAATAG | 245  |
| Dwil | ACCTCACTTACCCGTACGCCACAAATTGTTTCGTGCAGTATAACCCAGGACAACAAGTAG | 235  |

|       |                                                                                          |      |
|-------|------------------------------------------------------------------------------------------|------|
| dana  | AGAAACTTACTCTGACGCCACAACTGCTCGTGCAGGATCACCCAGGATAGCAGGTAG                                | 232  |
| Dpseu | GATGTACTTACGCGAACGCCACGAACTGCTCGTGCAGGATCACCCAGGAGAGCAGATAG                              | 239  |
| Dgrim | TCGTTACTTACCCTAACGCCAACGAACTGCTCGTGCAATATGACCCAGGAGAGCAAATAG                             | 797  |
|       | **   ** *   ***** ** ** ** ** ** ** *   ** ***** ** *   *   **                           |      |
| Dsim  | ACGCATGCCACGTTGGTGGCGAACAGTGCCAGGGCATCCGTGGCGTAGAGAACGTGCAGG                             | 1426 |
| Dsec  | ACGCATGCCACGTTGGTGGCGAACAGGGCCAGGGCATCCGTGGCGTAGAGTACGTGTAGG                             | 1402 |
| Dmel  | ACGCATGCCACGTTGGTGGCGAACAGGGCCAGGGCATCCGTGGCGTAGAGGACGTGCAGG                             | 1410 |
| Dyak  | ACGCATGCCACGTTGGTGGCGAACAGGGCCAGGGCATCCGTGGCGTAGAGGACGTGCAGG                             | 1417 |
| Dere  | ACGCATGCCACATTGGTGGCGAACAGGGCCAGGGCATCCGTGGCGTAGAGGACGTGCAGG                             | 1487 |
| dmoj  | ACACAGGCAACGTTTGTGCAAACAGCGCCAGTGCATCCGTGGCAAAGAGGACGTGCAGC                              | 312  |
| Dvir  | ACGCAGGCAACATTTGTGGCGAACAGTGCCAGTGCATCCGTGGCAAAGAGCACGTGCAGC                             | 305  |
| Dwil  | ACACAGGCAACATTTGTGGCAAACAGGGCCAGGGCATCGGTGGCAAAGAGGACATGCAGG                             | 295  |
| dana  | ACGCAGGCCACATTGGTGGCGAACAGAGCCAGTGCATCCGTGGCGTAGAGCACGTGCAGG                             | 292  |
| Dpseu | ACGCAGGCCACATTGGTGGCGAACAGGGCCAGGGCATCCGTGGCATAAGAGCACGTTTCAGG                           | 299  |
| Dgrim | ACGCAAGCAACGTTTGTGGCAAACAGAGCCAGTGCATCTGTTGCAAAGAGAACATGCAGC                             | 857  |
|       | ** ** ** ** ** ** ** ** ** ** ** **  ** ** **  ***** ***** ***** ** **   ***** ** *   ** |      |
| Dsim  | GAGAGGGTGTACAGGTAGGTGGTGACCAGCCACAAAATGCAGAAGCAGAGGCAGCGATTG                             | 1486 |
| Dsec  | GAGAGGGTGTACAGGTAGGTGGTGACCAGCCACAAAATGCAGAAGCAGAGGCAGCGATTG                             | 1462 |
| Dmel  | GACAGGGTGTACAGGTAGGTGGTGACCAGCCACAAAATGCAGAAGCAGAGGCAGCGATTG                             | 1470 |
| Dyak  | GAGAGGGTGTACAGGTAGGTGGTGACCAGCCACAAAATGCAGAAGCAGAGGCAGCGATTG                             | 1477 |
| Dere  | GAGAGGGTGTACAGGTAGGTGGTGACCAGCCATAGAATGCAGAAGCAGAGGCAGCGATTG                             | 1547 |
| dmoj  | GACAGGGTGTACAGGTAGGTGGTCACCAGCCACAGGATGCAAAAAGGATAGACAGCGATTG                            | 372  |
| Dvir  | GACAGCGTGTACAGATATGTTGTTACCAGCCACAGGATGCAGAAGGACAGGCAGCGATTG                             | 365  |
| Dwil  | GACAGAGTGTACAGATATGTGGTTACCAGCCACAGTATGCAGAATGAGAGGCAGCGATTG                             | 355  |
| dana  | GACAGTGTGTAAAGGTAGGTGGTTACCAGCCACAAAATGCAGAAGCAGAGGCAGCGATTG                             | 352  |
| Dpseu | GAGAGCGTATACAGGTAGGTGGTGACCAGCCACAAAATGCAAAAACGAGAGGCAGCGATTG                            | 359  |
| Dgrim | GACAGTGTGTATAGATAGGTGGTCACCAGCCACAGGATGCAAAAAGGATAAGCAACGATTT                            | 917  |
|       | ** ** ** **  ** ** **  ***** **  *   ***** **  * *   ** *****                            |      |

|       |            |      |
|-------|------------|------|
| Dsim  | AGGAAGCGAC | 1496 |
| Dsec  | AGGAAGCGAC | 1472 |
| Dmel  | AGGAAGCGAC | 1480 |
| Dyak  | AGGAAGCGAC | 1487 |
| Dere  | AGGAAGCGAC | 1557 |
| dnoj  | AGGAAACGGC | 382  |
| Dvir  | AGGAAACGGC | 375  |
| Dwil  | AGAAAGCGTC | 365  |
| dana  | AGAAAACGAC | 362  |
| Dpseu | AGGAAGCGAC | 369  |
| Dgrim | AGGAAACGGC | 927  |
|       | ** ** *    | *    |
