# Supplementary material
Source: PubMed Central journal article supplement (PMC2855778)
Supplement: NIHMS178348-supplement-Sup__data_file_6.pdf [file NIHMS178348-supplement-Sup__data_file_6.pdf]

[ 1] #Mauritiana  
[ 2] #Simulans  
[ 3] #Sechelia  
[ 4] #Melanogaster  
[ 5] #Yakuba  
[ 6] #Erecta  
[ 7] #Ananassae  
[ 8] #Mauritiana\_R  
[ 9] #Simulans\_R  
[10] #Sechelia\_R  
[11] #Melanogaster\_R  
[12] #Yakuba\_R  
[13] #Erecta\_R

[     1     2     3     4     5     6     7     8     9     10    11    12    13 ]  
[ 1]  
[ 2] 0.000  
[ 3] 0.002 0.002  
[ 4] 0.003 0.003 0.005  
[ 5] **0.023 0.023 0.025 0.023**  
[ 6] 0.021 0.021 0.022 0.021 0.009  
[ 7] 0.057 0.055 0.057 0.059 0.042 0.047  
[ 8] 0.131 0.132 0.133 0.132 0.131 0.129 0.146  
[ 9] 0.142 0.142 0.144 0.142 0.141 0.139 0.155 0.009  
[10] 0.140 0.140 0.142 0.140 0.139 0.137 0.152 0.009 0.011  
[11] 0.141 0.141 0.143 0.144 0.135 0.134 0.149 0.050 0.061 0.060  
[12] 0.124 0.124 0.126 0.128 0.120 0.117 0.128 **0.055 0.063 0.064 0.069**  
[13] 0.126 0.126 0.128 0.130 0.121 0.119 0.137 0.063 0.068 0.072 0.072 0.025
