# Supplementary material
Source: PubMed Central journal article supplement (PMC2855778)

a. w1118

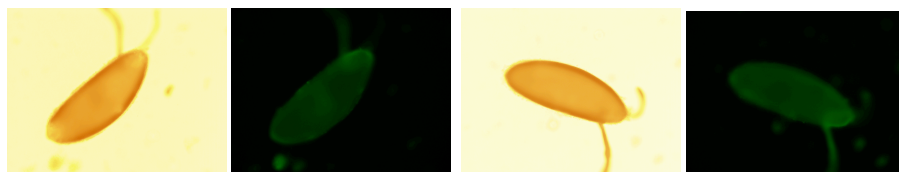

b. 2.13.2

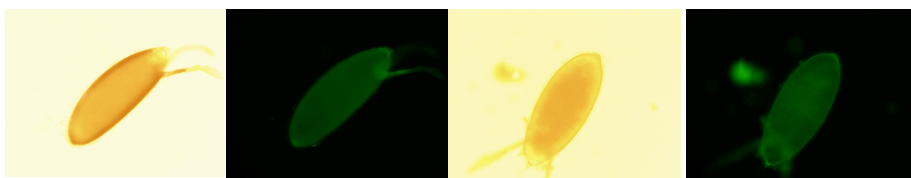

2.17.1

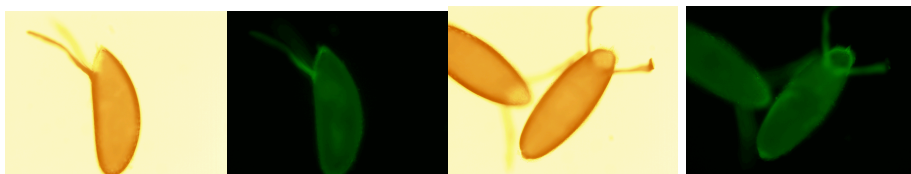

2.46.3

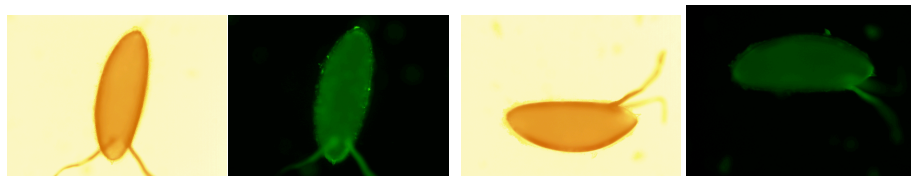

2.58.2

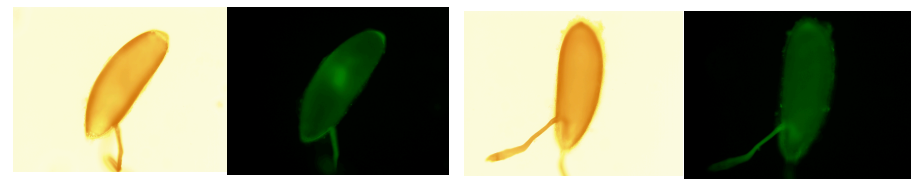

2.58.5

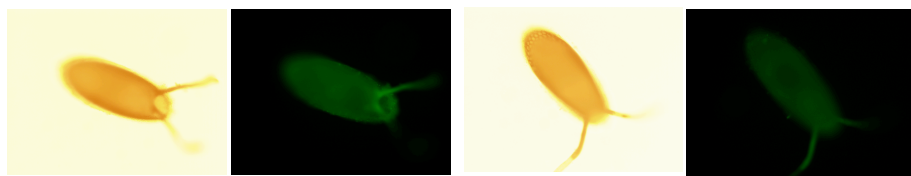

Supplement: NIHMS178348-supplement-Sup__figure_1.pdf [file NIHMS178348-supplement-Sup__figure_1.pdf]

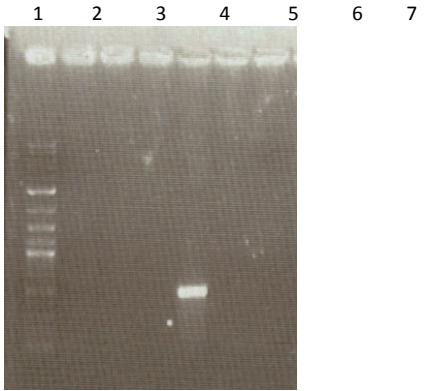

Supplement: NIHMS178348-supplement-Sup__figure_2.pdf [file NIHMS178348-supplement-Sup__figure_2.pdf]
